# Supplementary material
Source: HighWire-hosted journal article supplement (https://thorax.bmj.com/content/75/9/801)

**Skeletal muscle adiposity and outcomes in candidates for lung transplantation:  
A Lung Transplant Body Composition Cohort Study**

Michaela R Anderson MD MS, Imaani Easthausen MS, Grace Gallagher BA,  
Jayaram Udupa PhD, Yubing Tong PhD, Drew Torigian MD, Joshua Diamond MD MS,  
Mary Porteous MD, Scott Palmer MD, Laurie Snyder MD, John Kim MD MS,  
Luke Benvenuto MD, Meghan Aversa MD, Selim Arcasoy MD, John R. Greenland MD PhD, Steven Hays MD,  
Jasleen Kukreja MD MPH, Edward Cantu MD MS, Dymrna Gallagher EdD,  
Matthew Baldwin MD MS, R. Graham Barr MD Dr.PH, David J Lederer MD MS,  
Jason Christie MD MS, Jonathan P Singer MD MS

**Supplementary Appendix**

**Table S1:** Baseline characteristics by tertile of mean thigh muscle attenuation

**Table S2:** Baseline characteristics by tertile of mean abdominal muscle attenuation.

**Table S3:** Association between muscle attenuation and thigh IMAT index with six-minute walk distance in subgroups

**Figure S1:** Axial computed tomography (CT) images at the level of the (A) mid-thigh, with identification of (B) muscle area, and (C) intramuscular adipose tissue. Axial CT images at the level of the (D) abdomen at the L4/L5 vertebral level, with identification of (E) abdominal muscle area.

**Figure S2:** Flowchart for patient inclusion in (A) thigh analyses and (B) abdominal analyses

**Table S1:** Baseline characteristics by tertile of mean thigh muscle attenuation

|                                      | Lowest Tertile of<br>Thigh Muscle<br>Attenuation (N=92) | Middle Tertile of<br>Thigh Muscle<br>Attenuation (N=92) | Highest Tertile of<br>Thigh Muscle<br>Attenuation (N=92) |
|--------------------------------------|---------------------------------------------------------|---------------------------------------------------------|----------------------------------------------------------|
| Age, years                           | 64 (58-68)                                              | 62 (52-66)                                              | 55 (40-63)                                               |
| Male gender                          | 50 (54)                                                 | 54 (59)                                                 | 53 (58)                                                  |
| Diagnosis*                           |                                                         |                                                         |                                                          |
| COPD                                 | 37 (40)                                                 | 30 (33)                                                 | 11 (12)                                                  |
| Interstitial lung disease            | 44 (48)                                                 | 46 (50)                                                 | 43 (47)                                                  |
| Sarcoidosis                          | 5 (5)                                                   | 3 (3)                                                   | 6 (7)                                                    |
| Cystic fibrosis                      | 3 (3)                                                   | 5 (5)                                                   | 21 (23)                                                  |
| PAH                                  | 3 (3)                                                   | 5 (5)                                                   | 5 (5)                                                    |
| Other                                | 0 (0)                                                   | 3 (3)                                                   | 5 (5)                                                    |
| Race*                                |                                                         |                                                         |                                                          |
| White                                | 27 (29)                                                 | 32 (35)                                                 | 31 (34)                                                  |
| African American                     | 1 (1)                                                   | 6 (7)                                                   | 4 (4)                                                    |
| Other                                | 0 (0)                                                   | 1 (1)                                                   | 3 (3)                                                    |
| Height, cm                           | 170.2 (161.3-177.8)                                     | 172.4 (162.6-177.8)                                     | 169.5 (162.6-175.3)                                      |
| Weight, kg                           | 80.9 (69.4-90.7)                                        | 72.4 (61.0-87.8)                                        | 68.0 (55.8-84.0)                                         |
| BMI, kg/m <sup>2</sup>               | 27.4 (24.5-30.8)                                        | 25.3 (21.9-29.0)                                        | 23.2 (21.2-27.6)                                         |
| BMI Category                         |                                                         |                                                         |                                                          |
| <18.5                                | 1 (1)                                                   | 2 (2)                                                   | 8 (9)                                                    |
| 18.5-25                              | 26 (28)                                                 | 43 (47)                                                 | 45 (49)                                                  |
| 25-30                                | 35 (38)                                                 | 30 (33)                                                 | 29 (32)                                                  |
| 30-35                                | 28 (30)                                                 | 16 (17)                                                 | 10 (11)                                                  |
| >35                                  | 2 (2)                                                   | 1 (1)                                                   | 0 (0)                                                    |
| Forced Vital Capacity (L)            | 2.0 (1.5-2.8)                                           | 2.0 (1.5-2.8)                                           | 2.0 (1.6-2.6)                                            |
| Thigh Muscle Area (cm <sup>2</sup> ) | 188.3 (159.8-218.6)                                     | 191.8 (155.4-223.9)                                     | 186.4 (155.7-255.4)                                      |
| Center                               |                                                         |                                                         |                                                          |
| Center A                             | 37 (40)                                                 | 32 (35)                                                 | 35 (38)                                                  |
| Center B                             | 19 (21)                                                 | 22 (24)                                                 | 25 (27)                                                  |
| Center C                             | 36 (39)                                                 | 38 (41)                                                 | 32 (35)                                                  |

Continuous variables reported as median (interquartile range)

Categorical variables presented as N (%)

**Definition of abbreviations:** COPD: chronic obstructive pulmonary disease; PAH: pulmonary arterial hypertension; BMI: body mass index.

\*Race missing on 171 subjects, diagnosis missing on 1 subject.

**Table S2:** Baseline characteristics by tertile of mean abdominal muscle attenuation.

|                           | Lowest Tertile of Abdominal Muscle Attenuation (N=101) | Middle Tertile of Abdominal Muscle Attenuation (N=101) | Highest Tertile of Abdominal Muscle Attenuation (N=100) |
|---------------------------|--------------------------------------------------------|--------------------------------------------------------|---------------------------------------------------------|
| Age, years                | 64 (58-68)                                             | 61 (55-67)                                             | 54 (40-63)                                              |
| Male gender               | 44 (44)                                                | 56 (55)                                                | 66 (66)                                                 |
| Diagnosis                 |                                                        |                                                        |                                                         |
| COPD                      | 35 (35)                                                | 31 (31)                                                | 19 (19)                                                 |
| Interstitial lung disease | 57 (56)                                                | 39 (39)                                                | 41 (41)                                                 |
| Sarcoidosis               | 3 (3)                                                  | 6 (6)                                                  | 5 (5)                                                   |
| Cystic fibrosis           | 3 (3)                                                  | 7 (7)                                                  | 22 (22)                                                 |
| PAH                       | 3 (3)                                                  | 3 (3)                                                  | 7 (7)                                                   |
| Other                     | 0 (0)                                                  | 5 (5)                                                  | 5 (5)                                                   |
| Race                      |                                                        |                                                        |                                                         |
| White                     | 25 (25)                                                | 37 (37)                                                | 34 (34)                                                 |
| African American          | 1 (1)                                                  | 6 (6)                                                  | 4 (4)                                                   |
| Other                     | 2 (2)                                                  | 1 (1)                                                  | 2 (2)                                                   |
| Height, cm                | 167.6 (160.5-175.3)                                    | 170.9 (162.3-177.8)                                    | 171.5 (165.1-176.7)                                     |
| Weight, kg                | 78.6 (68.9-88.6)                                       | 73.0 (60.8-87.1)                                       | 69.6 (58.2-81.8)                                        |
| BMI, kg/m <sup>2</sup>    | 28.0 (24.4-30.3)                                       | 25.3 (22.7-29.3)                                       | 23.2 (20.8-26.3)                                        |
| BMI Category              |                                                        |                                                        |                                                         |
| <18.5                     | 1 (1)                                                  | 5 (5)                                                  | 10 (10)                                                 |
| 18.5-25                   | 29 (29)                                                | 42 (42)                                                | 52 (52)                                                 |
| 25-30                     | 40 (40)                                                | 31 (31)                                                | 32 (32)                                                 |
| 30-35                     | 28 (28)                                                | 23 (23)                                                | 6 (6)                                                   |
| >35                       | 3 (3)                                                  | 0 (0)                                                  | 0 (0)                                                   |
| Forced Vital Capacity (L) | 1.8 (1.5-2.5)                                          | 2.1 (1.6-2.6)                                          | 2.0 (1.6-2.9)                                           |
| Center                    |                                                        |                                                        |                                                         |
| Center A                  | 48 (48)                                                | 39 (39)                                                | 26 (26)                                                 |
| Center B                  | 26 (26)                                                | 24 (24)                                                | 25 (25)                                                 |
| Center C                  | 27 (27)                                                | 38 (38)                                                | 49 (49)                                                 |

Continuous variables reported as median (interquartile range)

Categorical variables presented as N (%)

**Definition of abbreviations:** COPD: chronic obstructive pulmonary disease; PAH: pulmonary arterial hypertension; BMI: body mass index.

\*Missing: Race for 190 subjects, Diagnosis for 1 subject.

**Table S3:** Association between muscle attenuation and thigh IMAT index with six-minute walk distance in subgroups

|                    | Change in 6MWD (meters) per ½ SD decrease in thigh MMA |        |            |                   | Change in 6MWD (meters) per doubling IMAT index |        |           |                   | Change in 6MWD (meters) per ½ SD decrease in abdominal MMA |        |           |                   |
|--------------------|--------------------------------------------------------|--------|------------|-------------------|-------------------------------------------------|--------|-----------|-------------------|------------------------------------------------------------|--------|-----------|-------------------|
|                    | N                                                      | 95% CI | P          | P for Interaction | N                                               | 95% CI | P         | P for Interaction | N                                                          | 95% CI | P         | P for Interaction |
| Diagnosis          |                                                        |        |            | 0.40              |                                                 |        |           | 0.60              |                                                            |        |           | 0.74              |
| Obstruction        | 80                                                     | -15    | -25 to -5  | 0.003             | 63                                              | -18    | -32 to -4 | 0.009             | 87                                                         | -25    | -24 to -5 | 0.002             |
| PH                 | 13                                                     | -33    | -61 to -6  | 0.02              | 8                                               | 3      | -38 to 45 | 0.88              | 13                                                         | -17    | -44 to 11 | 0.24              |
| CF/Bronchiectasis  | 35                                                     | 8      | -10 to 27  | 0.37              | 19                                              | -12    | -24 to 1  | 0.06              | 40                                                         | 8      | -13 to 28 | 0.47              |
| Pulmonary Fibrosis | 147                                                    | -18    | -26 to -10 | <0.001            | 100                                             | -16    | -28 to -5 | 0.006             | 161                                                        | -16    | -25 to -8 | <0.001            |

Models adjusted for age, sex, forced vital capacity, and muscle index with random effect for center.

**Definition of abbreviations:** MMA: mean muscle attenuation; 6MWD: six minute walk distance; PH: pulmonary hypertension; CF: cystic fibrosis; CI: confidence interval; SD: standard deviation; IMAT: intramuscular adipose tissue index

**Figure S1:** Axial computed tomography (CT) images at the level of the (A) mid-thigh, with identification of (B) muscle area, and (C) intramuscular adipose tissue. Axial CT images at the level of the (D) abdomen at the L4/L5 vertebral level, with identification of (E) abdominal muscle area.

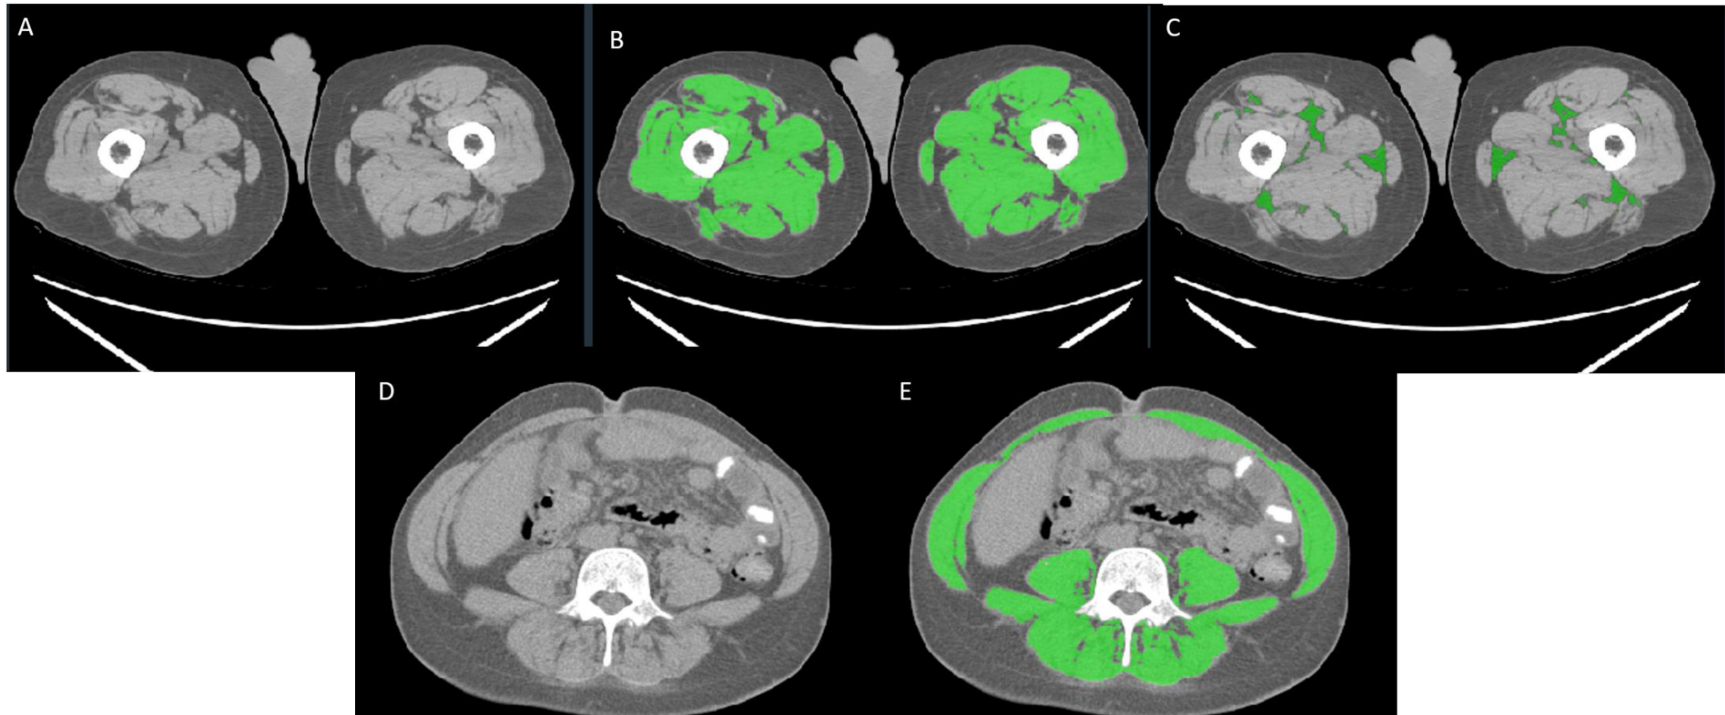

**Figure S2:** Flowchart for patient inclusion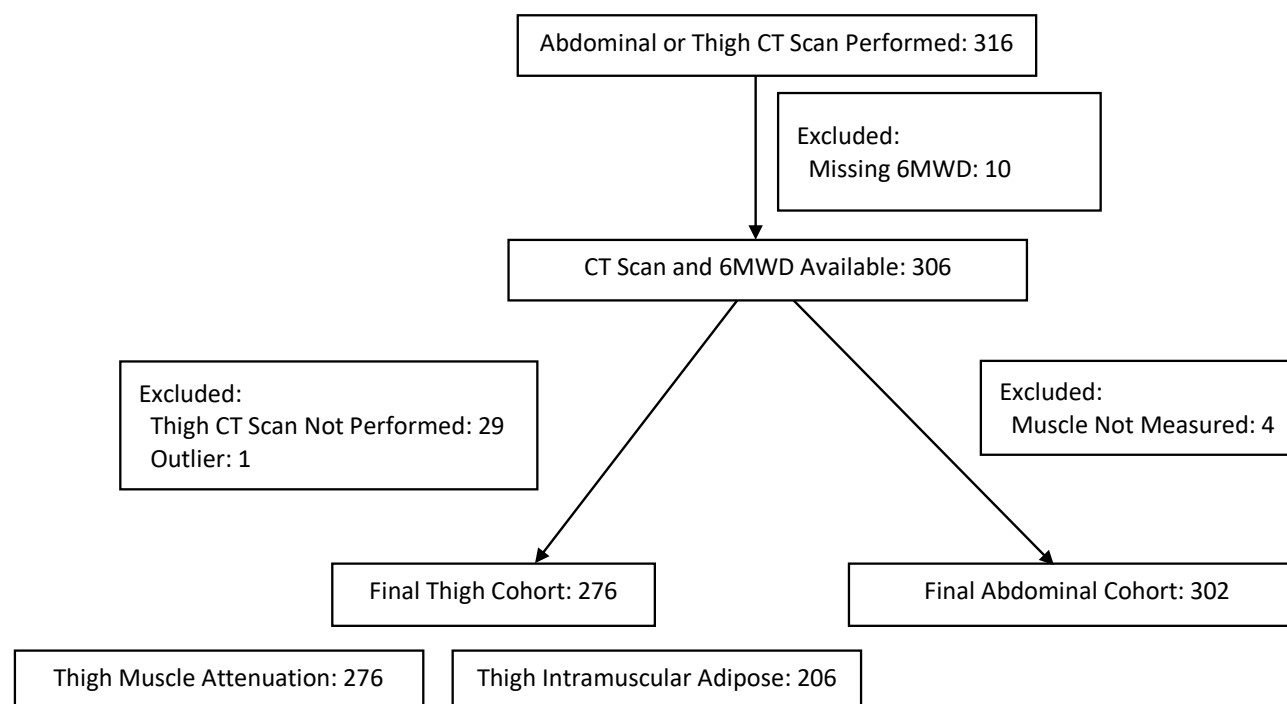

Supplement: inline-supplementary-material-1 [file inline-supplementary-material-1.pdf]
